# Supplementary material for: Seasonal and Age-Associated Pathogen Distribution in Newborn Calves with Diarrhea Admitted to ICU
Source: MDPI journal article supplement (doi:10.3390/vetsci8070128), 2021-07-09
Supplement: s1 [file s1]

# Supplementary Materials: Seasonal and Age-Associated Pathogen Distribution in Newborn Calves with Diarrhea Admitted to ICU

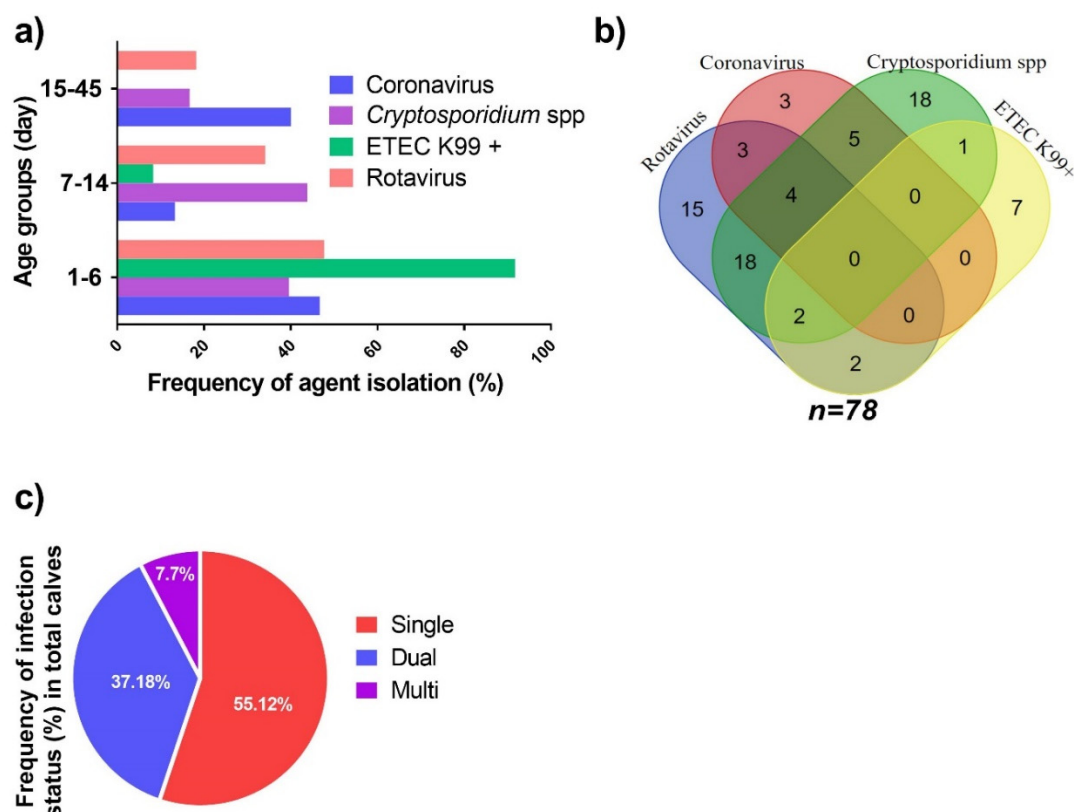

**Figure S1.** Representation of age distributions of identified pathogens from respective age groups. The respective frequencies for each pathogen (a) are shown. A Venn diagram shows the occurrence of pathogens in each calf based on single or co-infection (b). A pie chart (c) shows the frequencies of mode of infection.

**Table S1.** Chi-square test results for the determination of several risk factors of newborn diarrhea in the ICU.

| Risk Factors      |                     | Pathogen Distribution for Each Risk Factor |                          |                        |                                          |
|-------------------|---------------------|--------------------------------------------|--------------------------|------------------------|------------------------------------------|
|                   |                     | Rotavirus ( $n = 44$ )                     | Coronavirus ( $n = 15$ ) | ETEC K99+ ( $n = 12$ ) | <i>Cryptosporidium</i> spp. ( $n = 48$ ) |
|                   |                     | $n/\text{Total}$ (%)                       | $n/\text{Total}$ (%)     | $n/\text{Total}$ (%)   | $n/\text{Total}$ (%)                     |
| Season            | Winter ( $n = 35$ ) | 23/35 (65.7)                               | 8/35 (22.9)              | 4/35 (11.4)            | 22/35 (62.9)                             |
|                   | Spring ( $n = 26$ ) | 14/26 (53.8)                               | 4/26 (15.4)              | 6/26 (23.1)            | 11/26 (42.3)                             |
|                   | Summer ( $n = 6$ )  | 4/6 (66.7)                                 | 2/6 (33.3)               | 0/6 (0)                | 5/6 (83.3)                               |
|                   | Autumn ( $n = 11$ ) | 3/11 (27.3)                                | 1/11 (9.1)               | 2/11 (18.2)            | 10/11 (90.9)                             |
| $p$ -value        |                     | 0.1475 (ns)                                | 0.5641 (ns)              | 0.4302 (ns)            | 0.0255 (*)                               |
| Age (day)         | 1–6 ( $n = 35$ )    | 21/35 (60.0)                               | 7/35 (20.0)              | 11/35 (31.4)           | 19/35 (54.3)                             |
|                   | 7–14 ( $n = 28$ )   | 15/28 (53.6)                               | 2/28 (7.1)               | 1/28 (3.6)             | 21/28 (75.0)                             |
|                   | 15–45 ( $n = 15$ )  | 8/15 (53.3)                                | 6/15 (40.0)              | 0/15 (0.0)             | 8/15 (53.3)                              |
| $p$ -value        |                     | 0.8466 (ns)                                | 0.0332 (*)               | 0.0018(**)             | 0.1875 (ns)                              |
| Mode of Infection | Single              | 15/44 (34.1)                               | 3/15 (20.0)              | 7/12 (58.3)            | 18/48 (37.5)                             |
|                   | Dual                | 23/44 (52.3)                               | 8/15 (53.3)              | 3/12 (25.0)            | 24/48 (50.0)                             |
|                   | Multi               | 6/44 (13.6)                                | 4/15 (26.7)              | 2/12 (16.7)            | 6/48 (12.5)                              |
| $p$ -value        |                     | <0.0001 (***)                              | 0.1225 (ns)              | 0.0724 (ns)            | 0.0004 (***)                             |
